# Supplementary material for: High-Density Linkage Map Construction and QTL Identification in a Diploid Blueberry Mapping Population
Source: Front Plant Sci. 2021 Jun 21;12:692628. doi: 10.3389/fpls.2021.692628 (PMC8256855; doi:10.3389/fpls.2021.692628)
Supplement: Supplementary file 2 [file Table_1.XLSX]

## Sheet: stats.re
Supplementary Table 1. Summary of population re-sequencing and mapping statistics.
Individual ID	BioSample ID	Total sequences	Reads mapped	Reads un-mapped	Total length (bp)	Bases mapped (bp)	Mismatches	Error rate	Average mapping quality
299-1	SAMN15162502	8410771	7959408	451363	849487871	803900208	17412288	0.0225961	39.5
299-10	SAMN15162503	5394726	5125633	269093	544867326	517688933	10655949	0.0214772	39.6
299-100	SAMN15162504	11394762	10833072	561690	1150870962	1094140272	21972969	0.0209216	39.4
299-101	SAMN15162505	13779429	13141216	638213	1391722329	1327262816	27091591	0.0212957	39.7
299-102	SAMN15162506	5803420	5501752	301668	586145420	555676952	11766460	0.0221501	39.5
299-11	SAMN15162507	8624664	8171126	453538	871091064	825283726	16589649	0.0209457	39.6
299-12	SAMN15162508	9611369	9126563	484806	970748269	921782863	18654556	0.0210847	39.6
299-13	SAMN15162509	7687866	7297183	390683	776474466	737015483	14246120	0.0201264	39.6
299-14	SAMN15162510	10255193	9736771	518422	1035774493	983413871	19492123	0.0206474	39.5
299-15	SAMN15162511	7413451	7099904	313547	748758551	717090304	14459330	0.0210393	39.8
299-16	SAMN15162512	16224812	15341343	883469	1638706012	1549475643	31253363	0.0210051	39.4
299-17	SAMN15162513	3747581	3552853	194728	378505681	358838153	7951201	0.0233082	39.5
299-18	SAMN15162514	7183832	6830319	353513	725567032	689862219	13927490	0.0210677	39.6
299-19	SAMN15162515	6953440	6604761	348679	702297440	667080861	14642960	0.0229642	39.6
299-2	SAMN15162516	11998019	11435762	562257	1211799919	1155011962	23328931	0.0210971	39.6
299-20	SAMN15162517	6675150	6168791	506359	674190150	623047891	15355347	0.026425	39.2
299-21	SAMN15162518	9761994	9286087	475907	985961394	937894787	19434636	0.0216338	39.6
299-22	SAMN15162519	12759906	12122820	637086	1288750506	1224404820	26035945	0.0222352	39.7
299-23	SAMN15162520	17754018	16619845	1134173	1793155818	1678604345	38059839	0.0241029	39.3
299-24	SAMN15162521	17229386	16341164	888222	1740167986	1650457564	33954571	0.0214544	39.6
299-25	SAMN15162522	17197315	16308870	888445	1736928815	1647195870	33818217	0.0214027	39.6
299-26	SAMN15162523	2583865	2442521	141344	260970365	246694621	5665689	0.0247259	39.6
299-27	SAMN15162524	6819281	6484419	334862	688747381	654926319	13498100	0.0214984	39.6
299-3	SAMN15162525	10786857	10186120	600737	1089472557	1028798120	20992713	0.0212663	39.4
299-30	SAMN15162526	12889974	12279128	610846	1301887374	1240191928	25610006	0.0215448	39.7
299-31	SAMN15162527	8229327	7699195	530132	831162027	777618695	18604774	0.025506	39.1
299-32	SAMN15162528	11741817	11139030	602787	1185923517	1125042030	22207010	0.0205542	39.5
299-33	SAMN15162529	12500738	11912344	588394	1262574538	1203146744	23719288	0.0205549	39.7
299-35	SAMN15162530	17416871	16481578	935293	1759103971	1664639378	35719435	0.0223909	39.5
299-37	SAMN15162531	7226583	6873930	352653	729884883	694266930	14120673	0.0212373	39.6
299-38	SAMN15162532	6151055	5859214	291841	621256555	591780614	12388087	0.0218596	39.6
299-39	SAMN15162533	12329904	11630049	699855	1245320304	1174634949	23491942	0.0208439	39.5
299-4	SAMN15162534	12508913	11915224	593689	1263400213	1203437624	23880837	0.0206897	39.6
299-41	SAMN15162535	5820112	5504640	315472	587831312	555968640	12452072	0.0234704	39.5
299-42	SAMN15162536	3189103	3003411	185692	322099403	303344511	6812423	0.0236356	39.5
299-44	SAMN15162537	6758707	6399532	359175	682629407	646352732	13632041	0.0220102	39.5
299-45	SAMN15162538	10328002	9721420	606582	1043128202	981863420	20131048	0.0213713	39.4
299-46	SAMN15162539	7148552	6767877	380675	722003752	683555577	14168673	0.0216043	39.4
299-47	SAMN15162540	8248376	7824884	423492	833085976	790313284	16559678	0.0218872	39.5
299-48	SAMN15162541	13655708	12781780	873928	1379226508	1290959780	29207693	0.0238492	39.2
299-49	SAMN15162542	15023472	14214234	809238	1517370672	1435637634	29697079	0.0215624	39.4
299-5	SAMN15162543	8944421	8463650	480771	903386521	854828650	18501340	0.0225747	39.5
299-50	SAMN15162544	15241438	14343477	897961	1539385238	1448691177	30465073	0.0219323	39.6
299-51	SAMN15162545	9128617	8580802	547815	921990317	866661002	17120934	0.0205937	39.6
299-52	SAMN15162546	8349159	7887061	462098	843265059	796593161	18615044	0.0243928	39.7
299-53	SAMN15162547	15231839	14442204	789635	1538415739	1458662604	28853194	0.0206186	39.6
299-54	SAMN15162548	9650241	9043423	606818	974674341	913385723	20976344	0.0244227	39.4
299-55	SAMN15162549	12593080	11851756	741324	1271901080	1197027356	24989712	0.0217648	39.5
299-56	SAMN15162550	9812503	9185750	626753	991062803	927760750	24066320	0.0278763	39.4
299-58	SAMN15162551	10574453	9959579	614874	1068019753	1005917479	20272645	0.0210109	39.5
299-59	SAMN15162552	15493135	14581862	911273	1564806635	1472768062	29193940	0.020699	39.5
299-6	SAMN15162553	12685298	12039639	645659	1281215098	1216003539	25947590	0.022253	39.6
299-60	SAMN15162554	9544905	9083939	460966	964035405	917477839	18443922	0.0209676	39.7
299-61	SAMN15162555	10492975	9947004	545971	1059790475	1004647404	19500931	0.0202322	39.6
299-63	SAMN15162556	8530642	8089749	440893	861594842	817064649	16889947	0.0215585	39.5
299-64	SAMN15162557	11367568	10740120	627448	1148124368	1084752120	21899284	0.0210733	39.5
299-65	SAMN15162558	10474586	9924836	549750	1057933186	1002408436	20001249	0.0207897	39.5
299-68	SAMN15162559	10229651	9688188	541463	1033194751	978506988	19457915	0.0207067	39.5
299-69	SAMN15162560	9247884	8756963	490921	934036284	884453263	17555544	0.0207082	39.6
299-7	SAMN15162561	10041503	9377431	664072	1014191803	947120531	23141157	0.0261513	39.2
299-70	SAMN15162562	4899356	4673180	226176	494834956	471991180	9948704	0.0221011	39.7
299-71	SAMN15162563	7740286	7338645	401641	781768886	741203145	14537422	0.0204501	39.5
299-72	SAMN15162564	7654889	7285045	369844	773143789	735789545	15497278	0.0219835	39.6
299-73	SAMN15162565	7792193	7261079	531114	787011493	733368979	18528012	0.0271833	39.1
299-74	SAMN15162566	5847591	5542010	305581	590606691	559743010	11946190	0.022268	39.5
299-75	SAMN15162567	11034867	10484839	550028	1114521567	1058968739	21517466	0.0211732	39.7
299-76	SAMN15162568	10634548	10161427	473121	1074089348	1026304127	19919357	0.020253	39.8
299-77	SAMN15162569	7396140	7035810	360330	747010140	710616810	14655127	0.021546	39.6
299-78	SAMN15162570	4564351	4227778	336573	460999451	427005578	11002132	0.0281816	39.1
299-79	SAMN15162571	5873803	5574712	299091	593254103	563045912	12035492	0.022386	39.5
299-8	SAMN15162572	5412585	5144033	268552	546671085	519547333	10621736	0.0213172	39.6
299-81	SAMN15162573	7151662	6797254	354408	722317862	686522654	13988442	0.0212733	39.5
299-82	SAMN15162574	9816675	9371579	445096	991484175	946529479	19757000	0.0217709	39.7
299-83	SAMN15162575	4843080	4625179	217901	489151080	467143079	9831453	0.0220736	39.7
299-84	SAMN15162576	12204044	11612473	591571	1232608444	1172859773	22942004	0.0204344	39.7
299-85	SAMN15162577	11281896	10674076	607820	1139471496	1078081676	22405845	0.0216619	39.4
299-86	SAMN15162578	6458262	6110119	348143	652284462	617122019	12936284	0.0218481	39.4
299-87	SAMN15162579	9430094	8930551	499543	952439494	901985651	19041173	0.022008	39.4
299-88	SAMN15162580	12148932	11498884	650048	1227042132	1161387284	23670683	0.0212464	39.5
299-89	SAMN15162581	9422996	8941805	481191	951722596	903122305	18205928	0.0209983	39.5
299-9	SAMN15162582	10639192	10111768	527424	1074558392	1021288568	20136642	0.0205443	39.6
299-90	SAMN15162583	10626896	10074024	552872	1073316496	1017476424	20760305	0.0212634	39.6
299-91	SAMN15162584	9081559	8629620	451939	917237459	871591620	18893782	0.0226138	39.6
299-92	SAMN15162585	11354073	10786532	567541	1146761373	1089439732	22023279	0.0210773	39.6
299-93	SAMN15162586	6358893	6070922	287971	642248193	613163122	13607502	0.0231853	39.7
299-95	SAMN15162587	12726699	12063375	663324	1285396599	1218400875	25210157	0.0215567	39.5
299-96	SAMN15162588	8823941	8371766	452175	891218041	845548366	16690452	0.0205357	39.6
299-97	SAMN15162589	5949201	5516357	432844	600869301	557152057	14885780	0.0287196	38.9
299-98	SAMN15162590	5375685	4987006	388679	542944185	503687606	11894685	0.0256951	39.1
299-99	SAMN15162591	4409123	4199055	210068	445321423	424104555	9921992	0.0246503	39.7
300-1	SAMN15162592	12247187	11586165	661022	1236965887	1170202665	25847164	0.0232832	38.4
300-10	SAMN15162593	3245715	3079509	166206	327817215	311030409	6664284	0.0227404	39.5
300-11	SAMN15162594	17732531	16842437	890094	1790985631	1701086137	34388582	0.0210798	39.6
300-12	SAMN15162595	16019685	15225160	794525	1617988185	1537741160	29880327	0.0202305	39.6
300-13	SAMN15162596	10364091	9831131	532960	1046773191	992944231	20652416	0.0216652	39.5
300-14	SAMN15162597	13731295	12908177	823118	1386860795	1303725877	27870635	0.0222848	39.1
300-15	SAMN15162598	9914009	9282548	631461	1001314909	937537348	19696379	0.0218823	38.8
300-16	SAMN15162599	12699447	11974186	725261	1282644147	1209392786	28982508	0.0252898	39.2
300-17	SAMN15162600	16016732	14942320	1074412	1617689932	1509174320	37171115	0.0260539	39.1
300-18	SAMN15162601	5245371	4842756	402615	529782471	489118356	14044687	0.0309505	38.8
300-19	SAMN15162602	14003332	13269377	733955	1414336532	1340207077	27296377	0.0212139	39.4
300-2	SAMN15162603	15661057	14797012	864045	1581766757	1494498212	30011485	0.0209188	39.4
300-20	SAMN15162604	11014771	10482487	532284	1112491871	1058731187	20527625	0.0202027	39.5
300-21	SAMN15162605	1457524	1291522	166002	147209924	130443722	3227465	0.0273781	38.1
300-22	SAMN15162606	9049812	8626002	423810	914031012	871226202	19263632	0.0230702	39.6
300-23	SAMN15162607	8869658	8418580	451078	895835458	850276580	17909956	0.0219544	39.5
300-24	SAMN15162608	11406696	10819210	587486	1152076296	1092740210	21102963	0.0200884	39.5
300-25	SAMN15162609	5990292	5554240	436052	605019492	560978240	15492736	0.029767	38.9
300-26	SAMN15162610	6613418	6033165	580253	667955218	609349665	16072206	0.028609	39
300-27	SAMN15162611	11869420	11242696	626724	1198811420	1135512296	23256182	0.0213974	39.5
300-3	SAMN15162612	7605668	7217433	388235	768172468	728960733	14951838	0.0214219	39.5
300-4	SAMN15162613	8416282	8040001	376281	850044482	812040101	17342960	0.0222946	39.7
300-5	SAMN15162614	15342605	14605097	737508	1549603105	1475114797	30744484	0.0217263	39.6
300-6	SAMN15162615	14845081	14091230	753851	1499353181	1423214230	29435657	0.0215423	39.5
300-7	SAMN15162616	14465187	13752849	712338	1460983887	1389037749	26711389	0.0200027	39.6
300-8	SAMN15162617	17710460	16799182	911278	1788756460	1696717382	33243850	0.0203902	39.6
300-9	SAMN15162618	8494300	8087441	406859	857924300	816831541	17122318	0.0218572	39.6
F1-10	SAMN15162498	49648405	46667483	2980922	5014488905	4713415783	100983050	0.0224007	39.3
FLA-4B	SAMN15162499	30615344	28650079	1965265	3092149744	2893657979	89103806	0.0327359	39.2
W85-20	SAMN15162500	44668140	42266637	2401503	4511482140	4268930337	67026824	0.0163273	39.4
W85-23	SAMN15162501	17429707	16388683	1041024	1760400407	1655256983	38922568	0.0247954	39.1
