# Supplementary material for: High-Density Linkage Map Construction and QTL Identification in a Diploid Blueberry Mapping Population
Source: Front Plant Sci. 2021 Jun 21;12:692628. doi: 10.3389/fpls.2021.692628 (PMC8256855; doi:10.3389/fpls.2021.692628)
Supplement: Supplementary file 6 [file Table_5.XLSX]

## Sheet: Color_scar_genes_LG2-update-010
Supplementary Table 5. List of genes in vicinity of major color QTL (on LG02) from the draft diploid blueberry genome.
LG	Scaffold_ID	Gene_position_start	Gene_position_end	Gene_ID	BlastX_NCBI_accession	NCBI annotation	Max_score	E_value	Identity	GDV annotation
2	scaffold00003	8982	9697	376_g.1	NBB84582.1	dihydroxy-acid dehydratase	36.6	3.5	0.45	-
2	scaffold00003	14941	15221	gene.scaffold00003.path1.gene2.1	No hit					-
2	scaffold00003	21000	21508	CUFF.343.1	GFZ03791.1	hypothetical protein Acr_16g0004150 [Actinidia rufa]	82.8	5e-17	0.46	-
2	scaffold00003	21743	30966	CUFF.364.1	XP_028087918.1	receptor-like protein 4 [Camellia sinensis]	942	0	0.82	GN80-7926-MONOMER (GSVIVT01011948001) non-specific serine/threonine protein kinase; receptor protein-tyrosine kinase (scov=94.5,ident=71.7)
2	scaffold00003	44669	45278	CUFF.347.1	KAF7124258.1	hypothetical protein RHSIM_Rhsim12G0081800	84	4e-16	0.41	-
2	scaffold00003	61896	62606	CUFF.351.1	XP_013602457.1	PREDICTED: uncharacterized protein	57	3e-07	0.84	-
2	scaffold00003	62725	70008	CUFF.366.1	APB08589.1	NAC [Rhododendron molle]	785	0	0.89	-
2	scaffold00003	93893	94238	395_g.1	No hit					-
2	scaffold00003	94691	95680	CUFF.354.1	GFY85446.1	hypothetical protein Acr_04g0001840 [Actinidia rufa]	537	3e-177	0.83	-
2	scaffold00003	95794	96575	CUFF.355.1	GFY85446.1	hypothetical protein Acr_04g0001840 [Actinidia rufa]	305	3e-92	0.78	-
2	scaffold00003	96745	97252	CUFF.357.1	XP_018435667.1	PREDICTED: LOW QUALITY PROTEIN: uncharacterized	144	3e-38	0.63	-
2	scaffold00003	142887	148055	CUFF.362.1	AYC35397.1	leucoanthocyanidin reductase [Vaccinium corymbosum]	706	0	1	GN80-11698-MONOMER (GSVIVT01011958001) EC-1.17.1.3 leucoanthocyanidin reductase (scov=96.8,ident=71.5) PlantCyc PWY-6029|2,3-trans-flavanols biosynthesis;PWY-6035|2,3-cis-flavanols biosynthesis
2	scaffold00003	149044	153547	CUFF.476.1	KAE9454384.1	hypothetical protein C3L33_13720	926	0	0.87	-
2	scaffold00003	150936	153547	CUFF.477.1	KAE9454384.1	hypothetical protein C3L33_13720	926	0	0.87	-
2	scaffold00003	162629	167631	CUFF.363.1	KAF7124117.1	hypothetical protein RHSIM_Rhsim12G0081200	493	2e-167	0.93	-
2	scaffold00003	194542	195458	CUFF.367.1	KAF7124437.1	hypothetical protein RHSIM_Rhsim12G0195300	202	6e-58	0.48	-
2	scaffold00003	197885	198472	CUFF.368.1	No hit					-
2	scaffold00003	210949	211817	CUFF.369.1	KAE9454380.1	hypothetical protein C3L33_13717	280	1e-91	0.76	-
2	scaffold00003	212056	219874	CUFF.388.1	KAF7124862.1	hypothetical protein RHSIM_Rhsim12G0080800	447	0	0.87	-
2	scaffold00003	226868	229231	CUFF.374.1	No hit					-
2	scaffold00003	243522	245202	426_g.1	KAE9459202.1	hypothetical protein C3L33_08895	55.1	1e-06	0.78	-
2	scaffold00003	246570	247223	CUFF.375.1	RXH70097.1	hypothetical protein DVH24_007353 [Malus domestica]	56.2	2e-06	0.43	-
2	scaffold00003	257031	258633	CUFF.376.1	KAF7123548.1	hypothetical protein RHSIM_Rhsim12G0080500	384	4e-128	0.88	-
2	scaffold00003	270463	272998	434_g.1	No hit					-
2	scaffold00003	277172	278129	435_g.1	No hit					-
2	scaffold00003	300605	308141	CUFF.383.1	PSS13404.1	Phosphate transporter like	1238	0	0.85	-
2	scaffold00003	334735	335880	CUFF.385.1	XP_017978253.1	PREDICTED: F-box/LRR-repeat protein At3g59200	140	6e-34	0.34	-
2	scaffold00003	339566	339963	445_g.1	No hit					-
2	scaffold00003	349180	350494	CUFF.394.1	HDI78502.1	TPA: N-acetyltransferase	40.8	5.2	0.39	-
2	scaffold00003	358128	360493	CUFF.393.1	KAF7123498.1	hypothetical protein RHSIM_Rhsim12G0080200	614	0	0.8	-
2	scaffold00003	363932	364489	453_g.1	No hit					-
2	scaffold00003	366446	366825	454_g.1	No hit					-
2	scaffold00003	368121	369372	gene.g189.t1.1	XP_028123337.1	uncharacterized protein LOC114320438	315	2e-104	0.8	gi|359473025 PREDICTED: uncharacterized protein LOC100266416 from Vitis vinifera
2	scaffold00003	410243	411062	CUFF.398.1	KAF7112879.1	hypothetical protein RHSIM_RhsimUnG0183500	109	3e-25	0.81	-
2	scaffold00003	411345	411868	CUFF.399.1	KAF7112296.1	hypothetical protein RHSIM_RhsimUnG0244100	53.5	7e-12	0.41	-
2	scaffold00003	412386	412954	CUFF.400.1	WP_169385381.1	Rieske 2Fe-2S domain-containing protein	39.7	6.4	0.41	-
2	scaffold00003	417560	417982	469_g.1	KYF50969.1	hypothetical protein BE08_20295 [Sorangium cellulosum]	40	0.83	0.31	-
2	scaffold00003	417996	419568	CUFF.406.1	KAE9454391.1	hypothetical protein C3L33_13701	342	1e-114	0.78	GN7Y-21651-MONOMER (Potri.010G035500.1) glutathione transferase (scov=94.4,ident=62.1)
2	scaffold00003	426911	430355	CUFF.418.1	KAE9454404.1	hypothetical protein C3L33_13699	265	2e-85	0.89	-
2	scaffold00003	449220	453933	CUFF.409.1	KAA8532924.1	hypothetical protein F0562_032959 [Nyssa sinensis]	315	3e-102	0.67	-
2	scaffold00003	455518	460173	CUFF.446.1	KAF7123320.1	hypothetical protein RHSIM_Rhsim12G0078800	703	0	0.97	-
2	scaffold00003	465441	465646	480_g.1	No hit					-
2	scaffold00003	468597	478272	CUFF.413.1	PSS13471.1	CSC1-like protein [Actinidia chinensis var. chinensis]	564	0	0.8	-
2	scaffold00003	480850	484205	CUFF.411.1	KAE9454399.1	hypothetical protein C3L33_13694	164	1e-46	0.9	-
2	scaffold00003	491562	496268	CUFF.414.1	KAF7123857.1	hypothetical protein RHSIM_Rhsim12G0078000	1675	0	0.95	-
2	scaffold00003	504606	508930	CUFF.415.1	XP_028088982.1	protein UXT homolog isoform X1 [Camellia sinensis]	281	3e-91	0.93	-
2	scaffold00003	509953	514281	CUFF.417.1	KAF7123660.1	hypothetical protein RHSIM_Rhsim12G0077800	882	0	0.88	-
2	scaffold00003	518967	526456	CUFF.422.1	KAF7124490.1	hypothetical protein RHSIM_Rhsim12G0077700	822	0	0.86	-
2	scaffold00003	532190	536003	CUFF.421.1	KAE9454410.1	hypothetical protein C3L33_13685	421	2e-146	0.9	-
2	scaffold00003	537931	541399	CUFF.433.1	XP_028111108.1	uncharacterized protein At5g01610-like	287	2e-94	0.88	-
2	scaffold00003	544265	546772	CUFF.423.1	KAF7124194.1	hypothetical protein RHSIM_Rhsim12G0077400	309	2e-101	0.93	-
2	scaffold00003	548171	549824	CUFF.424.1	TNW00729.1	hypothetical protein C5H24_11650 [Xylella fastidiosa]	130	1e-27	0.67	-
2	scaffold00003	551760	562263	CUFF.438.1	KAF7123500.1	hypothetical protein RHSIM_Rhsim12G0077300	338	1e-105	0.93	-
2	scaffold00003	562428	563697	CUFF.439.1	No hit					-
2	scaffold00003	598406	600214	CUFF.441.1	KAF7123928.1	hypothetical protein RHSIM_Rhsim12G0099400	382	5e-130	0.79	-
2	scaffold00003	602084	603045	CUFF.431.1	THG16945.1	hypothetical protein TEA_015750	42	4.9	0.43	-
2	scaffold00003	603612	605088	CUFF.432.1	KAF7113720.1	hypothetical protein RHSIM_RhsimUnG0110000	53.1	0.002	0.92	-
2	scaffold00003	614558	616580	CUFF.434.1	KAF7124292.1	hypothetical protein RHSIM_Rhsim12G0006600	244	5e-178	0.86	-
2	scaffold00003	621489	625411	CUFF.437.1	KAF7123183.1	hypothetical protein RHSIM_Rhsim12G0076800	1393	0	0.88	GN7W-12738-MONOMER (cassava4.1_001900m) EC-1.9.3.1 cytochrome-c oxidase (scov=98.3,ident=61) PlantCyc PWY-3781|aerobic respiration (cytochrome c)
2	scaffold00003	626306	632302	CUFF.455.1	KAF7124937.1	hypothetical protein RHSIM_Rhsim12G0076700	402	2e-164	0.88	-
2	scaffold00003	634973	645851	CUFF.471.1	KAE9450174.1	hypothetical protein C3L33_17912	755	0	0.97	-
2	scaffold00003	650509	661622	CUFF.584.1	XP_028075611.1	probable leucine-rich repeat receptor-like protein	486	3e-157	0.84	GN80-14526-MONOMER (GSVIVT01012205001) non-specific serine/threonine protein kinase (scov=92.7,ident=83)
2	scaffold00003	666302	667545	CUFF.444.1	PHU02441.1	CLAVATA3/ESR (CLE)-related protein 9	56.2	7e-06	1	-
2	scaffold00003	669769	673787	CUFF.445.1	KAF7123931.1	hypothetical protein RHSIM_Rhsim12G0076300	470	2e-162	0.8	-
2	scaffold00003	676686	681357	CUFF.453.1	KAF7123089.1	hypothetical protein RHSIM_Rhsim12G0076200	946	0	0.95	GN7W-17574-MONOMER (cassava4.1_006657m) EC-1.1.1.22 UDP-glucose 6-dehydrogenase (scov=100,ident=87.3) PlantCyc PWY-4821|UDP-D-xylose and UDP-D-glucuronate biosynthesis;PWY-3821|galactose degradation III
2	scaffold00003	688481	696093	CUFF.482.1	KAF7123318.1	hypothetical protein RHSIM_Rhsim12G0076100	1159	0	0.9	-
2	scaffold00003	698842	701903	CUFF.447.1	KAE9454015.1	hypothetical protein C3L33_14129	236	7e-77	0.91	-
2	scaffold00003	708966	710714	CUFF.448.1	KAF7124201.1	hypothetical protein RHSIM_Rhsim12G0075600	118	1e-26	0.68	-
2	scaffold00003	710592	715893	CUFF.450.1	KAF7124201.1	hypothetical protein RHSIM_Rhsim12G0075600	526	0	0.96	-
2	scaffold00003	728290	734291	CUFF.501.1	XP_028057810.1	erlin-1-like [Camellia sinensis]	442	8e-161	0.88	-
2	scaffold00003	743354	747608	CUFF.467.1	KAF7124244.1	hypothetical protein RHSIM_Rhsim12G0075100	576	0	0.73	-
2	scaffold00003	754254	756307	gene.g223.t1.1	TEY38048.1	ubiquinone biosynthesis protein COQ4	353	4e-119	0.63	gi|225424639 PREDICTED: ubiquinone biosynthesis protein COQ4 homolog, mitochondrial from Vitis vinifera
2	scaffold00003	757783	761803	CUFF.464.1	KAF7124540.1	hypothetical protein RHSIM_Rhsim12G0074300	1296	0	0.92	-
2	scaffold00003	761874	762436	CUFF.466.1	No hit					-
2	scaffold00003	779245	779835	545_g.1	XP_023132804.1	tRNA methyltransferase 10 homolog C	38.9	0.79	0.32	-
2	scaffold00003	781326	784375	CUFF.459.1	KAF7123602.1	hypothetical protein RHSIM_Rhsim12G0074200	480	6e-169	0.9	GN7W-17947-MONOMER (cassava4.1_014004m) EC-3.1.1.31 6-phosphogluconolactonase (scov=99.6,ident=82.7) PlantCyc OXIDATIVEPENT-PWY|pentose phosphate pathway (oxidative branch)
2	scaffold00003	791435	793399	CUFF.460.1	XP_030936391.1	uncharacterized protein LOC115961572	134	2e-53	0.31	-
2	scaffold00003	801385	801646	gene.scaffold00003.path1.gene91.1	No hit					-
2	scaffold00003	802017	808076	CUFF.463.1	XP_028111130.1	folate synthesis bifunctional protein, mitochondria	862	0	0.85	GN7Y-32513-MONOMER (Potri.008G097400.1) dihydropteroate synthase (scov=100,ident=76)
2	scaffold00003	815035	818217	CUFF.465.1	AQM50863.1	putative CRABS CLAW-ortologous transcription factor	251	2e-81	0.87	-
2	scaffold00003	820395	824445	CUFF.472.1	KAF7124126.1	hypothetical protein RHSIM_Rhsim12G0073700	553	0	0.75	-
2	scaffold00003	835024	836154	CUFF.469.1	KAF7123600.1	hypothetical protein RHSIM_Rhsim12G0073600	327	1e-107	0.73	-
2	scaffold00003	837141	837713	CUFF.468.1	KAE9460593.1	hypothetical protein C3L33_07495	62	3e-09	0.74	-
2	scaffold00003	850778	864013	CUFF.484.1	KAF7124640.1	hypothetical protein RHSIM_Rhsim12G0073500	1270	0	0.84	-
2	scaffold00003	873459	873968	CUFF.480.1	KAF7123836.1	hypothetical protein RHSIM_Rhsim12G0072200	182	2e-50	0.75	-
2	scaffold00091	19114	20998	CUFF.7061.1	KAF7151323.1	hypothetical protein RHSIM_Rhsim02G0076100	52.8	0.002	0.56	-
2	scaffold00091	56064	56648	9709_g.1	TLU83402.1	glycosyltransferase [Chlorobium sp.]	37	2.2	0.41	-
2	scaffold00091	59949	60950	CUFF.7065.1	KAF7123504.1	hypothetical protein RHSIM_Rhsim12G0048700	201	3e-62	0.8	-
2	scaffold00091	67166	72928	CUFF.7068.1	KAE9454590.1	hypothetical protein C3L33_13507	952	0	0.92	GN80-7860-MONOMER (GSVIVT01020164001) urate permease; ascorbate transport; xanthine permease (scov=97.6,ident=85.1)
2	scaffold00091	80752	85350	CUFF.7069.1	KAF7124793.1	hypothetical protein RHSIM_Rhsim12G0048500	334	1e-113	0.84	-
2	scaffold00091	94068	95194	CUFF.7073.1	KAE9454594.1	hypothetical protein C3L33_13504	184	2e-52	0.7	-
2	scaffold00091	97008	97521	CUFF.7070.1	No hit					-
2	scaffold00091	97668	98241	CUFF.7071.1	No hit					-
2	scaffold00091	102590	105631	CUFF.7075.1	KAF7124927.1	hypothetical protein RHSIM_Rhsim12G0048300	657	0	0.94	GN7W-13839-MONOMER (cassava4.1_009407m) non-specific serine/threonine protein kinase (scov=87.7,ident=83.3)
2	scaffold00091	115531	117331	9723_g.1	KAF7154559.1	hypothetical protein RHSIM_Rhsim01G0190700	823	0	0.8	gi|225454072 PREDICTED: pre-mRNA-splicing factor CWC22 homolog from Vitis vinifera
2	scaffold00091	117556	118465	CUFF.7078.1	PKI77786.1	hypothetical protein CRG98_001834 [Punica granatum]	53.5	0.0001	0.36	-
2	scaffold00091	118632	119392	CUFF.7079.1	KAE9449201.1	hypothetical protein C3L33_18909	65.5	1e-08	0.62	-
2	scaffold00091	164373	165201	gene.scaffold00091.path1.gene15.1	KAF7154559.1	hypothetical protein RHSIM_Rhsim01G0190700	473	4e-162	0.9	gi|225454072 PREDICTED: pre-mRNA-splicing factor CWC22 homolog from Vitis vinifera
2	scaffold00091	189531	191828	CUFF.7082.1	No hit					-
2	scaffold00091	189846	191828	CUFF.7083.1	No hit					-
2	scaffold00091	238021	243040	CUFF.7101.1	XP_028123209.1	threonine--tRNA ligase, mitochondrial 1-like	724	0	0.85	GN7L-9503-MONOMER (evm.model.supercontig_642.1) EC-6.1.1.3 threonine-tRNA ligase (scov=91.8,ident=83.8) PlantCyc TRNA-CHARGING-PWY|tRNA charging
2	scaffold00091	252685	272755	CUFF.7098.1	KAF7124025.1	hypothetical protein RHSIM_Rhsim12G0047900	1574	0	0.94	-
2	scaffold00091	275008	275553	CUFF.7088.1	No hit					-
2	scaffold00091	280757	282131	CUFF.7089.1	KAF7124592.1	hypothetical protein RHSIM_Rhsim12G0047800	201	6e-53	0.92	-
2	scaffold00091	282337	289236	CUFF.7090.1	KAF7124592.1	hypothetical protein RHSIM_Rhsim12G0047800	1274	0	0.93	GN7W-14610-MONOMER (cassava4.1_001537m) EC-2.4.1.15 alpha,alpha-trehalose-phosphate synthase (UDP-forming) (scov=76.5,ident=81.3) PlantCyc TRESYN-PWY|trehalose biosynthesis I
2	scaffold00091	309689	311431	CUFF.7091.1	KAF7150603.1	hypothetical protein RHSIM_Rhsim02G0185700	53.9	6e-05	0.29	-
2	scaffold00091	314003	318758	CUFF.7097.1	KAF7123339.1	hypothetical protein RHSIM_Rhsim12G0047700	182	9e-56	0.93	-
2	scaffold00091	322751	324273	CUFF.7110.1	KAE9454605.1	hypothetical protein C3L33_13497	315	6e-103	0.98	-
2	scaffold00091	357068	357446	9767_g.1	KAE9446735.1	hypothetical protein C3L33_21370	100	7e-23	0.46	gi|357498823 hypothetical protein MTR_6g061920 from Medicago truncatula
2	scaffold00091	364584	372082	CUFF.7114.1	KAE9454606.1	hypothetical protein C3L33_13496	998	0	0.93	GN7L-5909-MONOMER (evm.model.supercontig_69.12) EC-1.2.1.3 aldehyde dehydrogenase (NAD+); benzaldehyde dehydrogenase (NAD+); phenylacetaldehyde dehydrogenase (scov=97,ident=82.2) PlantCyc PWY-2501|fatty acid &alpha;-oxidation I;PWY66-21|ethanol degradation II;PWY66-162|ethanol degradation IV
2	scaffold00091	372955	380938	CUFF.7119.1	PSS13582.1	RNA-binding protein like	805	0	0.78	-
2	scaffold00091	388545	391428	CUFF.7102.1	KAF7124749.1	hypothetical protein RHSIM_Rhsim12G0047300	360	1e-122	0.83	-
2	scaffold00091	391525	393771	CUFF.7104.1	KAE9454601.1	hypothetical protein C3L33_13493	176	1e-43	0.89	-
2	scaffold00133	10806	21851	CUFF.9268.1	KAE9454363.1	hypothetical protein C3L33_13730	651	0	0.94	-
2	scaffold00133	24983	31805	CUFF.9269.1	KAE9454364.1	hypothetical protein C3L33_13731	410	2e-129	0.93	-
2	scaffold00133	27759	31805	CUFF.9270.1	XP_028113082.1	uncharacterized protein LOC114311202	519	2e-171	0.64	-
2	scaffold00133	35479	51677	CUFF.9276.1	KAE9454366.1	hypothetical protein C3L33_13733	944	0	0.92	GN80-11947-MONOMER (GSVIVT01011916001) non-specific serine/threonine protein kinase (scov=81.7,ident=62.6)
2	scaffold00133	59355	62593	CUFF.9271.1	KAE9454367.1	hypothetical protein C3L33_13734	942	0	0.81	-
2	scaffold00133	67719	75716	CUFF.9274.1	KAF7124321.1	hypothetical protein RHSIM_Rhsim12G0082800	389	1e-132	0.87	-
2	scaffold00133	77823	79914	CUFF.9279.1	KAF7131918.1	hypothetical protein RHSIM_Rhsim09G0109100	208	1e-61	0.94	-
2	scaffold00133	80460	86032	CUFF.9280.1	GFZ21412.1	Rad23 UV excision repair protein family	245	1e-71	0.77	-
2	scaffold00133	101371	101660	12930_g.1	HDJ33831.1	TPA: SusC/RagA family TonB-linked outer membrane protein	35.8	5.4	0.48	-
2	scaffold00133	108665	109138	12931_g.1	No hit					-
2	scaffold00133	115205	122208	CUFF.9290.1	KAF7124786.1	hypothetical protein RHSIM_Rhsim12G0083200	952	0	0.93	GN7Y-20852-MONOMER (Potri.008G120000.2) alpha-glucosidase (scov=99.3,ident=80.8)
2	scaffold00133	128187	129604	12934_g.1	No hit					-
2	scaffold00133	145272	150928	CUFF.9281.1	KAF7124502.1	hypothetical protein RHSIM_Rhsim12G0083400	612	0	0.89	GN80-14577-MONOMER (GSVIVT01011901001) EC-1.1.1.1 alcohol dehydrogenase (scov=100,ident=80.4) PlantCyc PWY-5751|phenylethanol biosynthesis
2	scaffold00133	160364	163011	CUFF.9282.1	KAF7124918.1	hypothetical protein RHSIM_Rhsim12G0084300	723	0	0.94	GN7W-18846-MONOMER (cassava4.1_006208m) EC-2.3.1.199 fatty acid elongation; very-long-chain 3-ketoacyl-CoA synthase (scov=73.4,ident=87.7) PlantCyc PWY-5080|very long chain fatty acid biosynthesis I
2	scaffold00133	168936	172497	CUFF.9283.1	KAE9454334.1	hypothetical protein C3L33_13746	624	0	0.91	GN7Y-22945-MONOMER (Potri.010G125200.1) EC-2.1.1 homocysteine S-methyltransferase; methionine S-methyltransferase; selenocysteine methyltransferase (scov=98.5,ident=81.5) PlantCyc PWY-6933|seleno-amino acid detoxification and volatilization III;PWY-702|methionine biosynthesis II;PWY-6931|seleno-amino acid detoxification and volatilization I;PWY-5441|S-methylmethionine cycle
2	scaffold00133	172754	175942	CUFF.9288.1	KAF7123058.1	hypothetical protein RHSIM_Rhsim12G0084500	536	0	0.81	-
2	scaffold00133	216084	218319	gene.g4868.t1.1	KAF7123983.1	hypothetical protein RHSIM_Rhsim12G0085000	261	3e-86	0.86	GN7L-7173-MONOMER (evm.model.supercontig_282.14) EC-4.1.1.39 ribulose-bisphosphate carboxylase; primary-amine oxidase (scov=86.3,ident=68.3) PlantCyc CALVIN-PWY|Calvin-Benson-Bassham cycle;PWY-5751|phenylethanol biosynthesis;PWY-181|photorespiration
2	scaffold00133	226772	227418	12955_g.1	OCT95333.1	hypothetical protein XELAEV_18013021mg	35.4	6.5	0.44	-
2	scaffold00133	233093	235274	CUFF.9303.1	KAE9454344.1	hypothetical protein C3L33_13751	176	2e-43	0.5	-
2	scaffold00133	235557	242568	CUFF.9305.1	KAF7124452.1	hypothetical protein RHSIM_Rhsim12G0085200	445	2e-148	0.77	-
2	scaffold00133	253826	255165	CUFF.9301.1	KAF7123266.1	hypothetical protein RHSIM_Rhsim12G0085400	250	6e-77	0.73	-
2	scaffold00133	259917	260490	CUFF.9300.1	No hit					-
2	scaffold00133	279091	289984	CUFF.9340.1	KAF7123626.1	hypothetical protein RHSIM_Rhsim12G0085700	2022	0	0.85	GN7Y-21888-MONOMER (Potri.010G122200.4) ubiquitin-protein ligase (scov=99.5,ident=76.3)
2	scaffold00133	298001	298519	CUFF.9310.1	KAE9449915.1	hypothetical protein C3L33_18188	51.6	0.0004	0.44	-
2	scaffold00215	2	1988	CUFF.13038.1	KAF7123106.1	hypothetical protein RHSIM_Rhsim12G0055100	189	4e-65	0.87	-
2	scaffold00215	3116	4823	CUFF.13042.1	KAF7123285.1	hypothetical protein RHSIM_Rhsim12G0056900	228	6e-72	0.8	GN80-11532-MONOMER (GSVIVT01020089001) monodehydroascorbate reductase (NADH) (scov=87.7,ident=72.9)
2	scaffold00215	5401	6097	18330_g.1	No hit					-
2	scaffold00215	21780	22621	CUFF.13039.1	KAF7127811.1	hypothetical protein RHSIM_Rhsim11G0006000	93.6	4e-25	0.6	-
2	scaffold00215	38612	40365	CUFF.13041.1	KAE9454549.1	hypothetical protein C3L33_13549	785	0	0.81	GN7W-14541-MONOMER (cassava4.1_025197m) galactose oxidase (scov=96.5,ident=49.5)
2	scaffold00215	41302	47200	CUFF.13043.1	AML78271.1	putative LOV domain-containing protein	425	0	0.87	GN7Y-25931-MONOMER (Potri.010G053500.1) non-specific serine/threonine protein kinase (scov=97.5,ident=57)
2	scaffold00215	49573	55706	CUFF.13054.1	KAE9454542.1	hypothetical protein C3L33_13551	635	0	0.89	-
2	scaffold00215	69406	73167	CUFF.13044.1	GFZ14364.1	tetratricopeptide repeat (TPR)-containing protein	59.7	1e-05	0.88	-
2	scaffold00215	72116	73167	CUFF.13045.1	GFZ14364.1	tetratricopeptide repeat (TPR)-containing protein	59.7	9e-06	0.88	-
2	scaffold00215	74684	75867	CUFF.13047.1	No hit					-
2	scaffold00215	74684	75890	CUFF.13048.1	No hit					-
2	scaffold00215	76034	79339	CUFF.13049.1	KAF7123601.1	hypothetical protein RHSIM_Rhsim12G0057600	646	0	0.8	GN7Y-41373-MONOMER (Potri.008G148800.1) pectate lyase (scov=98.4,ident=62.4)
2	scaffold00215	80419	81904	CUFF.13128.1	KAE9454545.1	hypothetical protein C3L33_13554	128	4e-32	0.65	-
2	scaffold00215	93145	97991	CUFF.13052.1	KAF7124775.1	hypothetical protein RHSIM_Rhsim12G0058000	571	0	0.83	-
2	scaffold00215	98069	98596	CUFF.13053.1	No hit					-
2	scaffold00215	110340	115380	CUFF.13055.1	PSS14504.1	Constitutive photomorphogenesis protein	293	8e-95	0.9	GN7W-13584-MONOMER (cassava4.1_017268m) ubiquitin-protein ligase (scov=85.7,ident=82)
2	scaffold00215	117541	119725	18355_g.1	KAF7143212.1	hypothetical protein RHSIM_Rhsim05G0022200	57.8	1e-06	0.56	-
2	scaffold00215	126615	128495	CUFF.13056.1	KAE9445170.1	hypothetical protein C3L33_22933	254	9e-77	0.58	-
2	scaffold00215	157755	157870	18364_g.1	No hit					-
2	scaffold00215	158625	161027	CUFF.13066.1	KAF7123375.1	hypothetical protein RHSIM_Rhsim12G0061100	379	3e-127	0.86	-
2	scaffold00215	174336	176598	CUFF.13061.1	KAF7123485.1	hypothetical protein RHSIM_Rhsim12G0061200	132	4e-34	0.94	-
2	scaffold00215	186231	192208	CUFF.13062.1	KAF5945269.1	hypothetical protein HYC85_015497	419	7e-146	0.87	GN7Y-32223-MONOMER (Potri.010G012900.2) peptidylprolyl isomerase (scov=98.2,ident=80.5)
2	scaffold00215	220077	221824	CUFF.13133.1	KAF7124513.1	hypothetical protein RHSIM_Rhsim12G0061500	595	0	0.93	-
2	scaffold00215	222770	223452	CUFF.13134.1	No hit					-
2	scaffold00215	223916	224206	GI3MI6V01CAHRE.path1.1	No hit					-
2	scaffold00215	225341	225975	CUFF.13068.1	KAF7131969.1	hypothetical protein RHSIM_Rhsim09G0057800	175	2e-48	0.41	-
2	scaffold00215	245247	245836	CUFF.13069.1	KAE9454529.1	hypothetical protein C3L33_13567	50.1	7e-11	0.8	-
2	scaffold00215	255957	256718	CUFF.13071.1	XP_028118144.1	uncharacterized protein LOC114315742	80.5	3e-16	0.41	-
2	scaffold00215	258244	261400	CUFF.13112.1	KAF7128914.1	hypothetical protein RHSIM_Rhsim10G0040200	360	7e-123	0.98	-
2	scaffold00215	262667	266351	CUFF.13073.1	KAA8529444.1	hypothetical protein F0562_033757 [Nyssa sinensis]	262	1e-106	0.86	-
2	scaffold00292	2211	5443	CUFF.16624.1	PSS06154.1	Thiamine thiazole synthase	598	0	0.94	AT5G54770-MONOMER (AT5G54770.1) thiazole synthase subunit (scov=88.6,ident=86.8)
2	scaffold00292	14781	20806	CUFF.16627.1	XP_028095160.1	DNA polymerase epsilon subunit B	682	0	0.68	GN80-13459-MONOMER (GSVIVT01008158001) DNA-directed DNA polymerase (scov=90.2,ident=62.7)
2	scaffold00292	23896	28947	CUFF.16629.1	KAE9454508.1	hypothetical protein C3L33_13580	556	0	0.94	-
2	scaffold00292	36489	39272	CUFF.16632.1	KAF7125000.1	hypothetical protein RHSIM_Rhsim12G0063300	372	1e-118	0.96	GN80-12394-MONOMER (GSVIVT01020000001) EC-1.14 dihydrospingosine C-4 hydroxylase (scov=70.7,ident=87.4) PlantCyc PWY-5129|sphingolipid biosynthesis (plants)
2	scaffold00292	46494	48222	CUFF.16078.1	KAF7123314.1	hypothetical protein RHSIM_Rhsim12G0063400	641	0	0.72	-
2	scaffold00292	54611	62431	CUFF.16346.1	KAE9454513.1	hypothetical protein C3L33_13583	1148	0	0.95	-
2	scaffold00292	73580	83309	CUFF.16082.1	XP_028060905.1	uncharacterized protein LOC114264485	362	7e-119	0.82	-
2	scaffold00292	84056	86744	CUFF.16121.1	KAF7124834.1	hypothetical protein RHSIM_Rhsim12G0063700	144	8e-39	0.91	-
2	scaffold00292	94900	102217	CUFF.16085.1	KAE9454510.1	hypothetical protein C3L33_13586	888	0	0.62	-
2	scaffold00292	120792	125870	CUFF.16101.1	KAF7124806.1	hypothetical protein RHSIM_Rhsim12G0063800	1070	0	0.79	-
2	scaffold00292	130489	131179	CUFF.16084.1	No hit					-
2	scaffold00292	152776	161903	CUFF.16100.1	KAF7123837.1	hypothetical protein RHSIM_Rhsim12G0064000	1185	0	0.89	GN80-9908-MONOMER (GSVIVT01019973001) galactosylxylosylprotein 3-beta-galactosyltransferase (scov=99.7,ident=78.1)
2	scaffold00292	162768	164957	CUFF.16086.1	KAF7123896.1	hypothetical protein RHSIM_Rhsim12G0064100	231	6e-74	0.84	-
2	scaffold00292	169770	171697	CUFF.16087.1	PSR85026.1	Myb family transcription factor	353	1e-117	0.71	-
2	scaffold00292	177688	178349	CUFF.16089.1	No hit					-
2	scaffold00292	180781	181493	CUFF.16091.1	No hit					-
2	scaffold00292	194861	196354	CUFF.16094.1	KAF7123951.1	hypothetical protein RHSIM_Rhsim12G0064300	303	3e-131	0.71	-
2	scaffold00292	208105	209588	CUFF.16096.1	No hit					-
2	scaffold00292	215341	215844	CUFF.16099.1	No hit					-
2	scaffold00292	216146	218479	CUFF.16123.1	KAF7124368.1	hypothetical protein RHSIM_Rhsim12G0064400	382	5e-128	0.89	-
2	scaffold00623	4467	4768	37232_g.1	WP_081146617.1	DUF1972 domain-containing protein [Niastella vici]	35.8	5	0.4	-
2	scaffold00623	6780	8330	37233_g.1	No hit					-
2	scaffold00623	11053	13475	CUFF.25717.1	KAF7124742.1	hypothetical protein RHSIM_Rhsim12G0069800	422	2e-165	0.87	GN7Y-24442-MONOMER (Potri.010G134500.1) EC-1.11.1.7 peroxidase (scov=100,ident=71.1) PlantCyc PWY-5461|betanidin degradation
2	scaffold00623	34384	39018	CUFF.25718.1	KAF7123754.1	hypothetical protein RHSIM_Rhsim12G0070000	704	0	0.84	-
2	scaffold00623	42485	43102	gene.g13636.t1.1	KAF7124243.1	hypothetical protein RHSIM_Rhsim12G0070500	274	9e-88	0.86	gi|462423383 hypothetical protein PRUPE_ppa024271mg from Prunus persica
2	scaffold00623	57498	58616	CUFF.25723.1	No hit					-
2	scaffold00623	59673	60313	CUFF.25724.1	No hit					-
2	scaffold00623	73700	74554	gene.g13637.t1.1	KAF7123423.1	hypothetical protein RHSIM_Rhsim12G0070600	290	8e-94	0.85	gi|462423383 hypothetical protein PRUPE_ppa024271mg from Prunus persica
2	scaffold00623	74915	77842	CUFF.25720.1	KAE9447845.1	hypothetical protein C3L33_20254	1110	0	0.86	GN7L-10729-MONOMER (evm.model.supercontig_19.116) EC-1.9.3.1 cytochrome-c oxidase (scov=100,ident=71.3) PlantCyc PWY-3781|aerobic respiration (cytochrome c)
2	scaffold00623	75799	77842	CUFF.25721.1	KAE9447845.1	hypothetical protein C3L33_20254	673	0	0.85	GN7L-10729-MONOMER (evm.model.supercontig_19.116) EC-1.9.3.1 cytochrome-c oxidase (scov=60.4,ident=75.3) PlantCyc PWY-3781|aerobic respiration (cytochrome c)
2	scaffold00623	91154	94845	CUFF.25765.1	XP_028122596.1	uncharacterized protein LOC114319738	501	5e-174	0.87	GN7W-12592-MONOMER (cassava4.1_021127m) DNA-3-methyladenine glycosylase I (scov=97.8,ident=73.8)
2	scaffold00623	95489	96171	CUFF.25766.1	No hit					-
2	scaffold00623	97212	100378	CUFF.25767.1	WP_017098656.1	hypothetical protein [Vibrio tasmaniensis]	41.6	8.9	0.3	-
2	scaffold00623	97212	100378	CUFF.25768.1	No hit					-
2	scaffold00623	126243	130764	CUFF.25734.1	KAF7113480.1	hypothetical protein RHSIM_RhsimUnG0121900	322	2e-103	0.58	-
2	scaffold00623	126712	128305	CUFF.25736.1	GFS36695.1	hypothetical protein Acr_00g0047480 [Actinidia rufa]	75.1	4e-15	0.49	-
2	scaffold00623	129355	130764	CUFF.25735.1	KAF7113480.1	hypothetical protein RHSIM_RhsimUnG0121900	322	4e-104	0.58	-
2	scaffold00623	138384	139836	CUFF.25733.1	AOY34427.1	transcription factor BHLH056 [Vaccinium corymbosum]	79.7	9e-13	0.89	-
2	scaffold00623	140750	144854	CUFF.25738.1	AOY34427.1	transcription factor BHLH056 [Vaccinium corymbosum]	342	4e-111	0.94	-
2	scaffold00623	152064	154577	gene.g13643.t1.1	KAE9447706.1	hypothetical protein C3L33_20390	358	4e-117	0.69	gi|225440592 PREDICTED: uncharacterized protein LOC100244343 from Vitis vinifera
2	scaffold00623	157948	159983	CUFF.25739.1	KAF7123158.1	hypothetical protein RHSIM_Rhsim12G0071200	104	6e-25	0.65	-
2	scaffold00623	160719	165642	CUFF.25740.1	KAF7125008.1	hypothetical protein RHSIM_Rhsim12G0071300	481	3e-163	0.72	-
2	scaffold00771	3011	4371	CUFF.29176.1	KAF7123848.1	hypothetical protein RHSIM_Rhsim12G0043900	106	1e-20	1	-
2	scaffold00771	14000	16445	CUFF.29250.1	KYP56139.1	ADP-ribosylation factor 2 [Cajanus cajan]	231	5e-72	0.86	-
2	scaffold00771	17680	21320	CUFF.29189.1	XP_028100585.1	type 2 DNA topoisomerase 6 subunit B-like	345	3e-114	0.61	-
2	scaffold00771	22384	23167	CUFF.29190.1	No hit					-
2	scaffold00771	22384	24442	CUFF.29191.1	GAY36350.1	hypothetical protein CUMW_021580 [Citrus unshiu]	70.1	1e-10	0.65	-
2	scaffold00771	29027	38595	CUFF.29194.1	PSR84840.1	Pantothenate kinase	615	0	0.85	GN80-8285-MONOMER (GSVIVT01013761001) EC-2.7.1.33 pantothenate kinase (scov=91.9,ident=75.1) PlantCyc PANTO-PWY|phosphopantothenate biosynthesis I
2	scaffold00771	39746	41596	CUFF.29196.1	KAF7124746.1	hypothetical protein RHSIM_Rhsim12G0044400	523	0	0.89	GN7L-6262-MONOMER (evm.model.supercontig_69.53) glucan endo-1,3-beta-D-glucosidase (scov=93.1,ident=64)
2	scaffold00771	49282	54127	CUFF.29197.1	KAF7124806.1	hypothetical protein RHSIM_Rhsim12G0063800	1011	0	0.75	-
2	scaffold00771	60937	66811	CUFF.29198.1	KAF7124579.1	hypothetical protein RHSIM_Rhsim12G0044600	510	4e-176	0.78	-
2	scaffold00771	78555	80646	CUFF.29200.1	KAF7124624.1	hypothetical protein RHSIM_Rhsim12G0045800	232	6e-84	0.66	-
2	scaffold00771	83582	90134	CUFF.29202.1	XP_028097141.1	AMSH-like ubiquitin thioesterase 2 isoform X2	395	3e-135	0.82	-
2	scaffold00771	92392	95256	CUFF.29204.1	GFZ15518.1	RNI-like superfamily protein [Actinidia rufa]	503	1e-161	0.49	-
2	scaffold00771	92392	95256	CUFF.29205.1	GFZ15518.1	RNI-like superfamily protein [Actinidia rufa]	503	2e-162	0.49	-
2	scaffold00771	108928	110387	CUFF.29207.1	GFS35802.1	hypothetical protein Acr_00g0042140 [Actinidia rufa]	51.2	0.009	0.59	-
2	scaffold00771	110489	111250	CUFF.29208.1	XP_018479971.1	PREDICTED: uncharacterized protein	52	0.002	0.29	-
2	scaffold00771	111441	112295	CUFF.29210.1	KAF7124010.1	hypothetical protein RHSIM_Rhsim12G0046200	70.5	3e-10	0.45	-
2	scaffold00771	130998	133101	CUFF.29212.1	PSR93572.1	Disease resistance RPP13-like protein	489	9e-160	0.5	-
2	scaffold00771	137106	140617	CUFF.29214.1	KAF7123449.1	hypothetical protein RHSIM_Rhsim12G0045300	166	2e-46	0.45	-
2	scaffold00771	148986	150199	CUFF.29216.1	XP_018479971.1	PREDICTED: uncharacterized protein	45.1	1e-06	0.32	-
2	scaffold01335	2660	9477	CUFF.38511.1	KAF7130131.1	hypothetical protein RHSIM_Rhsim10G0214200	634	0	0.92	GN7W-18410-MONOMER (cassava4.1_006439m) dipeptidyl-peptidase II (scov=68.6,ident=80)
2	scaffold01335	12765	13243	56559_g.1	KAF7117270.1	hypothetical protein RHSIM_RhsimMtG0002800	38.1	1.5	0.65	-
2	scaffold01335	21612	33686	CUFF.38548.1	XP_028096110.1	zinc finger CCCH domain-containing protein	1589	0	0.66	-
2	scaffold01335	37640	42352	CUFF.38492.1	KAF7130815.1	hypothetical protein RHSIM_Rhsim10G0214300	226	3e-64	0.83	-
2	scaffold01335	51762	52410	CUFF.38491.1	XP_028084016.1	uncharacterized protein LOC114285186	149	2e-39	0.41	-
2	scaffold01335	61694	65613	CUFF.38514.1	KAF7129949.1	hypothetical protein RHSIM_Rhsim10G0214500	899	0	0.86	GN7V-22141-MONOMER (Glyma01g37430.1) ferulate 5-hydroxylase; coniferyl aldehyde 5-hydroxylase; coniferyl alcohol 5-hydroxylase (scov=94.6,ident=80.7) PlantCyc PWY-2181|free phenylpropanoid acid biosynthesis;PWY-361|phenylpropanoid biosynthesis
2	scaffold01562	10140	22873	CUFF.41004.1	KAF7124780.1	hypothetical protein RHSIM_Rhsim12G0055000	631	0	0.8	-
2	scaffold01562	44235	45381	CUFF.41013.1	No hit					-
2	scaffold01562	54081	60780	CUFF.41022.1	KAF5945293.1	hypothetical protein HYC85_015521	729	0	0.82	-
2	scaffold01988	7758	8806	CUFF.44937.1	No hit					-
2	scaffold01988	8971	10700	CUFF.44938.1	No hit					-
2	scaffold01988	10751	14913	CUFF.44950.1	KAF7123724.1	hypothetical protein RHSIM_Rhsim12G0062100	1359	0	0.97	-
2	scaffold01988	16475	21111	CUFF.44940.1	PSR85058.1	Haloacid dehalogenase-like hydrolase	288	1e-93	0.68	-
2	scaffold01988	22127	28947	CUFF.44941.1	KAF7123550.1	hypothetical protein RHSIM_Rhsim12G0062800	493	0	0.92	-
2	scaffold02259	2491	5601	CUFF.46833.1	KAF7123836.1	hypothetical protein RHSIM_Rhsim12G0072200	805	0	0.75	GN7Y-40474-MONOMER (Potri.010G139400.1) secologanin synthase (scov=98.6,ident=58.9)
2	scaffold02259	12449	13444	70212_g.1	KAF7123508.1	hypothetical protein RHSIM_Rhsim12G0072300	109	1e-31	0.82	gi|373501790 cytochrome P450 CYP749A20 from Panax ginseng
2	scaffold02264	2719	4549	CUFF.46865.1	THG21986.1	hypothetical protein TEA_017956	67.8	3e-12	0.8	-
2	scaffold02264	15074	20172	CUFF.46866.1	KAF7134920.1	hypothetical protein RHSIM_Rhsim08G0131200	747	0	0.88	-
2	scaffold02548	17062	21432	CUFF.48353.1	KAE9454518.1	hypothetical protein C3L33_13593	251	2e-69	0.73	-
