# Supplementary material for: High-Density Linkage Map Construction and QTL Identification in a Diploid Blueberry Mapping Population
Source: Front Plant Sci. 2021 Jun 21;12:692628. doi: 10.3389/fpls.2021.692628 (PMC8256855; doi:10.3389/fpls.2021.692628)
Supplement: Supplementary file 7 [file Table_6.XLSX]

## Sheet: vCombine.qtl.gene_no.color_lg10
Supplementary Table 6. List of genes in vicinity of major color QTL (on LG10) from the draft diploid blueberry genome.
LG	Scaffold_ID	Gene_position_start	Gene_position_end	Gene_ID	BlastX_NCBI_accession	NCBI annotation	Max_score	E_value	Identity	GDV annotation
10	scaffold00118	3844	4685	CUFF.8471.1	KAF7131772.1	hypothetical protein RHSIM_Rhsim09G0115700 [Rhododendron simsii]	234	5e-74	70.37	gi|297737918 unnamed protein product from Vitis vinifera
10	scaffold00118	18152	21816	CUFF.8472.1	PSR91227.1	HD domain-containing protein [Actinidia chinensis var. chinensis]	214	3e-63	98.1	gi|255546931 catalytic, putative from Ricinus communis
10	scaffold00118	28696	37744	CUFF.8477.1	KAF7133148.1	hypothetical protein RHSIM_Rhsim09G0115300 [Rhododendron simsii]	763	0	91.65	gi|225423802 PREDICTED: proline-rich receptor-like protein kinase PERK9 from Vitis vinifera
10	scaffold00118	28696	37744	CUFF.8477.2	KAF7133148.1	hypothetical protein RHSIM_Rhsim09G0115300 [Rhododendron simsii]	763	0	91.65	-
10	scaffold00118	44561	44674	CUFF.8473.1	No hit					-
10	scaffold00118	46321	55188	CUFF.8474.1	KAE9451095.1	hypothetical protein C3L33_17021 [Rhododendron williamsianum]	2004	0	90.98	GN7L-9964-MONOMER (evm.model.supercontig_1.246) Mg2+-ATPase (scov=96.2,ident=77.5)
10	scaffold00118	46321	55647	CUFF.8474.2	KAE9451095.1	hypothetical protein C3L33_17021 [Rhododendron williamsianum]	2216	0	90.92	GN7L-9964-MONOMER (evm.model.supercontig_1.246) Mg2+-ATPase (scov=98.3,ident=78.9)
10	scaffold00118	54825	54979	CUFF.8475.1	No hit					-
10	scaffold00118	72279	77655	CUFF.8476.1	KAE9451096.1	hypothetical protein C3L33_17022 [Rhododendron williamsianum]	882	0	78.58	-
10	scaffold00118	72279	81493	CUFF.8476.2	KAE9451096.1	hypothetical protein C3L33_17022 [Rhododendron williamsianum]	1114	0	81.08	gi|359472721 PREDICTED: tRNA-specific adenosine deaminase, chloroplastic-like from Vitis vinifera
10	scaffold00118	72279	81493	CUFF.8476.3	KAE9451096.1	hypothetical protein C3L33_17022 [Rhododendron williamsianum]	1114	0	81.08	-
10	scaffold00118	81985	85841	CUFF.8593.1	KAF5465126.1	hypothetical protein F2P56_015157 [Juglans regia]	317	6e-96	66.97	gi|147780464 hypothetical protein VITISV_010482 from Vitis vinifera
10	scaffold00118	82487	82861	CUFF.8594.1	No hit					-
10	scaffold00118	82528	82913	CUFF.8593.2	No hit					-
10	scaffold00118	89665	90007	11858_g.1	GFZ00912.1	hypothetical protein Acr_14g0005470 [Actinidia rufa]	79.3	2e-14	63.86	gi|147805068 hypothetical protein VITISV_004341 from Vitis vinifera
10	scaffold00118	92327	92715	11859_g.1	KAF7132635.1	hypothetical protein RHSIM_Rhsim09G0114800 [Rhododendron simsii]	47.8	0.0002	95	-
10	scaffold00118	93773	100226	CUFF.8595.1	KAF7132635.1	hypothetical protein RHSIM_Rhsim09G0114800 [Rhododendron simsii]	820	0	87.5	gi|508710292 EXS family protein from Theobroma cacao
10	scaffold00118	107868	108180	CUFF.8596.1	No hit					-
10	scaffold00118	108900	109155	gene.scaffold00118.path1.gene13.1	XP_028117867.1	probable leucine-rich repeat receptor-like protein kinase...	105	4e-24	62.96	gi|508775449 Transducin/WD40 repeat-like superfamily protein from Theobroma cacao
10	scaffold00118	109299	110105	11863_g.1	GFS38693.1	hypothetical protein Acr_00g0058920 [Actinidia rufa]	92	1e-22	34.78	-
10	scaffold00118	115280	121119	CUFF.8597.1	XP_028082063.1	probable isoprenylcysteine alpha-carbonyl methylesterase ICMEL...	589	0	79.4	GN80-9216-MONOMER (GSVIVT01012000001) prenylcysteine methylesterase (scov=79.3,ident=76.2)
10	scaffold00118	115280	121119	CUFF.8597.2	PSR88230.1	Isoprenylcysteine alpha-carbonyl methylesterase [Actinidia...	642	0	77.09	GN80-9216-MONOMER (GSVIVT01012000001) prenylcysteine methylesterase (scov=83.4,ident=76.9)
10	scaffold00118	115280	121570	CUFF.8598.1	PON79410.1	Alpha/beta hydrolase fold [Parasponia andersonii]	97.4	9e-23	62.82	GN7V-21655-MONOMER (Glyma16g18930.1) prenylcysteine methylesterase (scov=65.7,ident=71.1)
10	scaffold00118	122011	122115	CUFF.8599.1	KAF5730806.1	putative NADH dehydrogenase [Tripterygium wilfordii]	60.8	3e-10	93.1	-
10	scaffold00118	123039	123591	CUFF.8600.1	XP_019238405.1	PREDICTED: uncharacterized protein LOC109218495 [Nicotiana...	77.4	7e-14	40.24	gi|460378266 PREDICTED: uncharacterized protein LOC101250379 from Solanum lycopersicum
10	scaffold00118	124200	125731	CUFF.8601.1	ONI31259.1	hypothetical protein PRUPE_1G302100 [Prunus persica]	52	0.0001	89.66	-
10	scaffold00118	124367	125731	CUFF.8602.1	ONI31259.1	hypothetical protein PRUPE_1G302100 [Prunus persica]	52	8e-05	89.66	-
10	scaffold00118	126163	127617	CUFF.8603.1	KAE9451093.1	hypothetical protein C3L33_17027 [Rhododendron williamsianum]	61.2	4e-07	84.51	-
10	scaffold00118	127837	128348	CUFF.8604.1	KAD0280372.1	hypothetical protein E3N88_44516 [Mikania micrantha]	108	6e-27	79.41	gi|428166671 hypothetical protein GUITHDRAFT_79647 from Guillardia theta
10	scaffold00118	128917	129607	CUFF.8605.1	KAE9451093.1	hypothetical protein C3L33_17027 [Rhododendron williamsianum]	126	7e-33	76.64	gi|225423834 PREDICTED: uncharacterized protein LOC100252449 from Vitis vinifera
10	scaffold00118	131155	132279	11868_g.1	MCI17665.1	ABC transporter G family member 21-like [Trifolium medium]	99.8	1e-23	62.5	gi|357443153 ABC transporter G family member from Medicago truncatula
10	scaffold00118	135435	136438	CUFF.8482.1	No hit					-
10	scaffold00118	142284	142951	CUFF.8483.1	No hit					-
10	scaffold00118	145011	145492	CUFF.8484.1	No hit					-
10	scaffold00118	145586	145888	CUFF.8480.1	No hit					-
10	scaffold00118	146267	152084	gene.g4453.t1.1	PKU70959.1	Retrovirus-related Pol polyprotein from transposon TNT 1-94...	399	2e-119	45.94	gi|147767257 hypothetical protein VITISV_024007 from Vitis vinifera
10	scaffold00118	152263	152559	CUFF.8481.1	No hit					-
10	scaffold00118	159738	162964	CUFF.8485.1	KAF7131676.1	hypothetical protein RHSIM_Rhsim09G0114200 [Rhododendron simsii]	914	0	93.82	GN7V-27926-MONOMER (Glyma13g25240.1) maltose-transporting ATPase (scov=97,ident=49.7)
10	scaffold00118	170675	170960	gene.scaffold00118.path1.gene25.1	WP_168415608.1	Ty1/Copia family ribonuclease HI [Acinetobacter indicus]	139	1e-39	70.97	gi|147774365 hypothetical protein VITISV_037670 from Vitis vinifera
10	scaffold00118	194082	197053	CUFF.8536.1	KAE9451114.1	hypothetical protein C3L33_17031 [Rhododendron williamsianum]	493	4e-154	96.72	GN7W-10562-MONOMER (cassava4.1_003801m) EC-4.1.1.31 phosphoenolpyruvate carboxylase (scov=67.5,ident=85.5) PlantCyc PWY-6549|glutamine biosynthesis III;PWYQT-4429|CO2fixation into oxaloacetate (anapleurotic)
10	scaffold00118	194554	207279	CUFF.8537.1	KAE9451114.1	hypothetical protein C3L33_17031 [Rhododendron williamsianum]	1076	0	96.05	GN7L-7748-MONOMER (evm.model.supercontig_1.237) EC-4.1.1.31 phosphoenolpyruvate carboxylase (scov=83.2,ident=88.1) PlantCyc PWY-6549|glutamine biosynthesis III;PWYQT-4429|CO2 fixation into oxaloacetate (anapleurotic)
10	scaffold00118	216847	217154	CUFF.8486.1	No hit					-
10	scaffold00118	217326	217735	CUFF.8487.1	No hit					-
10	scaffold00118	217788	217894	CUFF.8488.1	No hit					-
10	scaffold00118	219130	222421	CUFF.8489.1	KAE9451113.1	hypothetical protein C3L33_17032 [Rhododendron williamsianum]	196	4e-53	79.49	GN7W-12668-MONOMER (cassava4.1_018393m) EC-3.6.1.22 8-oxo-7,8-dihydro-guanosine-triphosphate pyrophosphohydrolase; 8-oxo-dGTP diphosphatase; NAD+ diphosphatase; dihydroneopterin triphosphate pyrophosphohydrolase (scov=66.7,ident=69) PlantCyc PWY-5381|pyridine nucleotide cycling (plants);PWY-6502|oxidized GTP and dGTP detoxification;PWY-6147|6-hydroxymethyl-dihydropterin diphosphate biosynthesis I
10	scaffold00118	219130	222421	CUFF.8489.2	KAE9451113.1	hypothetical protein C3L33_17032 [Rhododendron williamsianum]	196	4e-53	79.49	GN7W-12668-MONOMER (cassava4.1_018393m) EC-3.6.1.22 8-oxo-7,8-dihydro-guanosine-triphosphate pyrophosphohydrolase; 8-oxo-dGTP diphosphatase; NAD+ diphosphatase; dihydroneopterin triphosphate pyrophosphohydrolase (scov=66.7,ident=69) PlantCyc PWY-5381|pyridine nucleotide cycling (plants);PWY-6502|oxidized GTP and dGTP detoxification;PWY-6147|6-hydroxymethyl-dihydropterin diphosphate biosynthesis I
10	scaffold00118	226787	226928	11887_g.1	No hit					-
10	scaffold00118	227696	228263	CUFF.8490.1	XP_028055196.1	uncharacterized protein LOC114259389 [Camellia sinensis]	95.1	7e-19	44.19	gi|224116250 predicted protein from Populus trichocarpa
10	scaffold00118	229483	229713	11888_g.1	No hit					-
10	scaffold00118	232757	235086	CUFF.8491.2	KAF2310561.1	hypothetical protein GH714_014494 [Hevea brasiliensis]	54.3	0.0002	60	-
10	scaffold00118	232757	235125	CUFF.8491.1	KAF2310561.1	hypothetical protein GH714_014494 [Hevea brasiliensis]	54.3	0.0001	60	-
10	scaffold00118	234271	234992	CUFF.8492.1	No hit					-
10	scaffold00118	240432	240624	gene.scaffold00118.path1.gene30.1	No hit					-
10	scaffold00118	241929	243110	CUFF.8493.1	XP_028052615.1	geranyl diphosphate phosphohydrolase [Camellia sinensis]	214	7e-67	80.49	GN80-14618-MONOMER (GSVIVT01011978001) EC-3.6.1.55 8-oxo-7,8-dihydro-guanosine-triphosphate pyrophosphohydrolase; 8-oxo-dGTP diphosphatase; NAD+ diphosphatase; dihydroneopterin triphosphate pyrophosphohydrolase (scov=83.2,ident=70.5) PlantCyc PWY-6502|oxidized GTP and dGTP detoxification;PWY-6147|6-hydroxymethyl-dihydropterin diphosphate biosynthesis I;PWY-5381|pyridine nucleotide cycling (plants)
10	scaffold00118	253063	254834	CUFF.8494.1	KAE9451112.1	hypothetical protein C3L33_17033 [Rhododendron williamsianum]	402	5e-134	84.27	gi|508710282 Uncharacterized protein TCM_011889 from Theobroma cacao
10	scaffold00118	258075	258827	CUFF.8495.1	No hit					-
10	scaffold00118	272402	272794	CUFF.8496.1	No hit					-
10	scaffold00118	288633	289490	CUFF.8498.1	KAE9451111.1	hypothetical protein C3L33_17034 [Rhododendron williamsianum]	380	2e-126	85.37	gi|359473008 PREDICTED: piriformospora indica-insensitive protein 2-like from Vitis vinifera
10	scaffold00118	289546	289821	CUFF.8499.1	KAE9451111.1	hypothetical protein C3L33_17034 [Rhododendron williamsianum]	178	2e-51	91.21	gi|460386580 PREDICTED: piriformospora indica-insensitive protein 2-like from Solanum lycopersicum
10	scaffold00118	290886	291051	CUFF.8500.1	No hit					-
10	scaffold00118	296483	301049	CUFF.8501.1	PSR88234.1	Protein CROWDED NUCLEI like [Actinidia chinensis var. chinensis]	212	1e-54	43.5	gi|359473006 PREDICTED: putative nuclear matrix constituent protein 1-like protein-like from Vitis vinifera
10	scaffold00118	312806	313214	CUFF.8502.1	No hit					-
10	scaffold00118	313319	321057	CUFF.8503.1	KAE9451110.1	hypothetical protein C3L33_17035 [Rhododendron williamsianum]	466	7e-153	87.93	gi|225423849 PREDICTED: uncharacterized protein LOC100242198 from Vitis vinifera
10	scaffold00118	319260	321057	CUFF.8503.2	KAE9451110.1	hypothetical protein C3L33_17035 [Rhododendron williamsianum]	393	7e-126	86.25	-
10	scaffold00118	324518	325785	CUFF.8504.1	KAE9451110.1	hypothetical protein C3L33_17035 [Rhododendron williamsianum]	51.2	0.01	65.85	-
10	scaffold00118	326140	326297	CUFF.8505.1	MCH98720.1	clavaminate synthase-like protein [Trifolium medium]	97.1	2e-24	86.27	gi|388510402 unknown from Medicago truncatula
10	scaffold00118	327510	327963	11912_g.1	No hit					-
10	scaffold00118	329851	330067	gene.scaffold00118.path1.gene44.1	No hit					-
10	scaffold00118	331406	333898	gene.g4468.t1.1	KAF7150679.1	hypothetical protein RHSIM_Rhsim02G0046600 [Rhododendron simsii]	204	8e-53	33.68	gi|147817139 hypothetical protein VITISV_040762 from Vitis vinifera
10	scaffold00118	334596	335668	gene.g4469.t1.1	KAB2617188.1	hypothetical protein D8674_013057 [Pyrus ussuriensis x Pyrus...	221	1e-62	42.25	GN7F-22908-MONOMER (LOC_Os12g02780.1) RNA-directed DNA polymerase (scov=62.1,ident=45)
10	scaffold00118	337422	337813	11915_g.1	No hit					-
10	scaffold00118	339027	339287	CUFF.8506.1	XP_034912687.1	clavaminate synthase-like protein At3g21360 [Populus alba]	116	7e-31	62.35	gi|224108559 predicted protein from Populus trichocarpa
10	scaffold00118	348915	349605	11918_g.1	CAB4292444.1	unnamed protein product [Prunus armeniaca]	252	5e-81	63.96	gi|462422543 hypothetical protein PRUPE_ppb013332mg from Prunus persica
10	scaffold00118	349930	350754	CUFF.8507.1	No hit					-
10	scaffold00118	357222	357627	11920_g.1	No hit					-
10	scaffold00118	359428	359939	11921_g.1	No hit					-
10	scaffold00431	6964	9132	CUFF.20555.1	KAF7133100.1	hypothetical protein RHSIM_Rhsim09G0108500 [Rhododendron simsii]	351	6e-113	69.18	gi|225423965 PREDICTED: ethylene-responsive transcription factor ERF118 from Vitis vinifera
10	scaffold00431	6964	9132	CUFF.20555.2	KAF7133100.1	hypothetical protein RHSIM_Rhsim09G0108500 [Rhododendron simsii]	351	5e-113	69.18	-
10	scaffold00431	16458	16848	29426_g.1	No hit					-
10	scaffold00431	17639	18158	CUFF.20565.1	No hit					-
10	scaffold00431	20098	21421	CUFF.20566.1	No hit					-
10	scaffold00431	21543	22328	CUFF.20567.1	No hit					-
10	scaffold00431	22734	28537	CUFF.20568.1	KAF7132029.1	hypothetical protein RHSIM_Rhsim09G0108400 [Rhododendron simsii]	223	2e-62	70.73	gi|460386498 PREDICTED: ethylene-responsive transcription factor ERF118-like isoform 1 from Solanum lycopersicum
10	scaffold00431	22734	28537	CUFF.20569.1	KAF7132029.1	hypothetical protein RHSIM_Rhsim09G0108400 [Rhododendron simsii]	223	3e-62	70.73	gi|460386498 PREDICTED: ethylene-responsive transcription factor ERF118-like isoform 1 from Solanum lycopersicum
10	scaffold00431	28945	29145	CUFF.20570.1	No hit					-
10	scaffold00431	30001	31422	29429_g.1	KAE9451025.1	hypothetical protein C3L33_17076 [Rhododendron williamsianum]	333	1e-111	82.59	gi|145359962 uncharacterized protein from Arabidopsis thaliana
10	scaffold00431	31677	32888	CUFF.20571.1	KAF5953645.1	hypothetical protein HYC85_006501 [Camellia sinensis]	82.8	6e-15	77.55	gi|224108480 predicted protein from Populus trichocarpa
10	scaffold00431	35212	35377	gene.scaffold00431.path1.gene8.1	No hit					-
10	scaffold00431	43734	44334	CUFF.20564.1	GFY85851.1	hypothetical protein Acr_04g0005890 [Actinidia rufa]	253	3e-75	60.56	gi|147770062 hypothetical protein VITISV_017108 from Vitis vinifera
10	scaffold00431	45800	48319	CUFF.20573.1	KAF7132819.1	hypothetical protein RHSIM_Rhsim09G0108300 [Rhododendron simsii]	936	0	91.84	GN7V-30294-MONOMER (Glyma20g24930.1) EC-2.3.1.199 fatty acid elongation; very-long-chain 3-ketoacyl-CoA synthase (scov=99.2,ident=77.3) PlantCyc PWY-5080|very long chain fatty acid biosynthesis I
10	scaffold00431	49295	49697	CUFF.20574.1	No hit					-
10	scaffold00431	49855	50763	CUFF.20572.1	No hit					-
10	scaffold00431	56510	63147	CUFF.20578.1	KAF7131911.1	hypothetical protein RHSIM_Rhsim09G0108200 [Rhododendron simsii]	294	4e-92	83.26	gi|225423975 PREDICTED: uncharacterized protein LOC100242187 isoform 1 from Vitis vinifera
10	scaffold00431	81533	84426	CUFF.20575.1	KAE9451028.1	hypothetical protein C3L33_17079 [Rhododendron williamsianum]	386	3e-151	77.5	gi|255581649 conserved hypothetical protein from Ricinus communis
10	scaffold00431	84896	85037	CUFF.20576.1	No hit					-
10	scaffold00431	106805	107142	CUFF.20577.1	No hit					-
10	scaffold00431	117101	121982	CUFF.20581.1	PSR91165.1	Otogelin like [Actinidia chinensis var. chinensis]	279	1e-90	86.84	gi|508708280 Uncharacterized protein TCM_009876 from Theobroma cacao
10	scaffold00431	123783	124026	CUFF.20579.1	No hit					-
10	scaffold00431	126569	126882	CUFF.20580.1	KAE9445153.1	hypothetical protein C3L33_22949 [Rhododendron williamsianum]	57	3e-07	42.86	-
10	scaffold00431	128909	129842	CUFF.20583.1	KAF7132599.1	hypothetical protein RHSIM_Rhsim09G0107800 [Rhododendron simsii]	109	7e-25	88.24	gi|460386488 PREDICTED: uncharacterized protein LOC101254996 from Solanum lycopersicum
10	scaffold00431	130711	131612	CUFF.20582.1	KAE9451031.1	hypothetical protein C3L33_17083 [Rhododendron williamsianum]	45.8	0.004	80	-
10	scaffold00431	135589	135854	29453_g.1	GER48854.1	ribosomal protein L2 [Striga asiatica]	95.5	7e-23	89.8	-
10	scaffold00431	149308	155299	CUFF.20586.1	KAF7131825.1	hypothetical protein RHSIM_Rhsim09G0107700 [Rhododendron simsii]	292	4e-95	98.31	gi|460386490 PREDICTED: 50S ribosomal protein L15, chloroplastic-like from Solanum lycopersicum
10	scaffold00431	159138	159329	CUFF.20584.1	CAN66724.1	hypothetical protein VITISV_022331 [Vitis vinifera]	53.9	2e-06	46.43	gi|147767381 hypothetical protein VITISV_022331 from Vitis vinifera
10	scaffold00431	166326	167697	29459_g.1	GFZ21369.1	Calcineurin-like metallo-phosphoesterase superfamily protein...	176	2e-46	38.92	gi|133711804 copia LTR rider from Solanum lycopersicum
10	scaffold00431	175213	175818	CUFF.20585.1	KAF7133405.1	hypothetical protein RHSIM_Rhsim09G0107600 [Rhododendron simsii]	145	8e-39	71.94	gi|359472690 PREDICTED: zinc finger protein JAGGED-like from Vitis vinifera
10	scaffold00431	195487	195754	gene.scaffold00431.path1.gene21.1	No hit					-
10	scaffold00431	196085	201794	CUFF.20587.1	KAE9451016.1	hypothetical protein C3L33_17085 [Rhododendron williamsianum]	487	7e-168	88.47	-
10	scaffold00431	203430	215568	CUFF.20587.2	KAF7132362.1	hypothetical protein RHSIM_Rhsim09G0107300 [Rhododendron simsii]	651	0	83.12	GN80-9113-MONOMER (GSVIVT01011888001) EC-3.1.1.23 acylglycerol lipase (scov=84,ident=75.2) PlantCyc LIPAS-PWY|triacylglycerol degradation
10	scaffold00632	21	3922	CUFF.25952.1	KAF3965109.1	hypothetical protein CMV_010666 [Castanea mollissima]	551	0	84.1	GN7V-33344-MONOMER (Glyma10g41830.1) non-specific serine/threonine protein kinase (scov=95.8,ident=68.7)
10	scaffold00632	5155	9520	CUFF.25953.1	KAE9451001.1	hypothetical protein C3L33_17105 [Rhododendron williamsianum]	611	0	82.07	gi|508708200 Core-2/I-branching beta-1,6-N-acetylglucosaminyltransferase family protein isoform 1 from Theobroma cacao
10	scaffold00632	14125	14747	37566_g.1	No hit					-
10	scaffold00632	19921	20549	CUFF.25954.1	No hit					-
10	scaffold00632	20821	21531	CUFF.25955.1	KAF5732490.1	putative ATP synthase subunit d [Tripterygium wilfordii]	47.4	0.018	91.3	-
10	scaffold00632	21747	25406	CUFF.25956.1	XP_039038628.1	V-type proton ATPase subunit D-like [Hibiscus syriacus]	253	2e-81	94.57	gi|508701054 ATP synthase subunit d, putative isoform 1 from Theobroma cacao
10	scaffold00632	26844	28955	CUFF.25957.1	XP_002279551.2	PREDICTED: uncharacterized protein LOC100250702 [Vitis vinifera]	368	4e-169	80.75	gi|225424039 PREDICTED: uncharacterized protein LOC100250702 from Vitis vinifera
10	scaffold00632	29072	48691	CUFF.25967.1	KAF7133446.1	hypothetical protein RHSIM_Rhsim09G0105100 [Rhododendron simsii]	848	0	88.82	gi|225424037 PREDICTED: uncharacterized protein LOC100247470 from Vitis vinifera
10	scaffold00632	29072	48691	CUFF.25967.2	KAF7133446.1	hypothetical protein RHSIM_Rhsim09G0105100 [Rhododendron simsii]	848	0	88.82	-
10	scaffold00632	32445	48691	CUFF.25967.3	KAF7133446.1	hypothetical protein RHSIM_Rhsim09G0105100 [Rhododendron simsii]	663	0	89.95	-
10	scaffold00632	52081	55584	CUFF.25958.1	KAF7132664.1	hypothetical protein RHSIM_Rhsim09G0105300 [Rhododendron simsii]	946	0	77.21	GN7W-11503-MONOMER (cassava4.1_030282m) non-specific serine/threonine protein kinase (scov=95.6,ident=50.4)
10	scaffold00632	57364	62641	CUFF.25959.1	KAE9451004.1	hypothetical protein C3L33_17102 [Rhododendron williamsianum]	618	0	95.83	gi|460386458 PREDICTED: chaperone protein dnaJ 15-like from Solanum lycopersicum
10	scaffold00632	64086	65190	CUFF.25960.1	KAF7133015.1	hypothetical protein RHSIM_Rhsim09G0105400 [Rhododendron simsii]	71.2	2e-09	77.23	gi|460382490 PREDICTED: chaperone protein dnaJ 15-like from Solanum lycopersicum
10	scaffold00632	87078	94498	CUFF.25961.1	KAF7132712.1	hypothetical protein RHSIM_Rhsim09G0105600 [Rhododendron simsii]	535	0	89.69	GN80-11606-MONOMER (GSVIVT01015813001) EC-6.1.1.16 cysteine-tRNA ligase (scov=92.6,ident=72.5) PlantCyc TRNA-CHARGING-PWY|tRNA charging
10	scaffold00632	96955	97788	CUFF.25962.1	KAE8077293.1	hypothetical protein FH972_015866 [Carpinus fangiana]	156	1e-43	57.86	gi|359472940 PREDICTED: uncharacterized protein LOC100266460 from Vitis vinifera
10	scaffold00632	98461	98585	CUFF.25963.1	No hit					-
10	scaffold00632	98635	100248	CUFF.25964.1	KAF7131789.1	hypothetical protein RHSIM_Rhsim09G0105800 [Rhododendron simsii]	210	2e-58	89.47	gi|460401164 PREDICTED: putative F-box protein At3g25750-like from Solanum lycopersicum
10	scaffold00632	104839	105472	CUFF.25965.1	No hit					-
10	scaffold00632	109104	111213	CUFF.25966.1	KAF7131619.1	hypothetical protein RHSIM_Rhsim09G0106000 [Rhododendron simsii]	253	2e-75	65.8	gi|359472942 PREDICTED: uncharacterized protein LOC100244117 from Vitis vinifera
10	scaffold00632	131889	138427	CUFF.25989.1	KAF7132516.1	hypothetical protein RHSIM_Rhsim09G0106300 [Rhododendron simsii]	586	0	94.25	-
10	scaffold00632	131889	141316	CUFF.25989.2	KAE9450996.1	hypothetical protein C3L33_17096 [Rhododendron williamsianum]	693	0	87.34	GN80-9606-MONOMER (GSVIVT01011871001) EC-6.1.1.18 glutamine-tRNA ligase (scov=67.8,ident=77.9) PlantCyc TRNA-CHARGING-PWY|tRNA charging
10	scaffold00632	135009	138427	CUFF.25989.3	MBA0624758.1	hypothetical protein [Gossypium davidsonii]	293	3e-95	93.79	-
10	scaffold00632	145149	145627	37589_g.1	No hit					-
10	scaffold00632	151763	151910	CUFF.25968.1	AUD38166.1	cytochrome c maturase subunit Fc [Pentas lanceolata]	63.5	5e-10	82.86	gi|372450306 cytochrome c biogenesis FC (mitochondrion) from Lotus japonicus
10	scaffold00632	152634	154636	CUFF.25969.1	KAF7150838.1	hypothetical protein RHSIM_Rhsim02G0033700 [Rhododendron simsii]	438	6e-150	86.64	gi|462420112 hypothetical protein PRUPE_ppa009143mg from Prunus persica
10	scaffold00632	155343	156081	CUFF.25970.1	No hit					-
10	scaffold00931	5899	8945	CUFF.32280.1	KAF7132854.1	hypothetical protein RHSIM_Rhsim09G0111400 [Rhododendron simsii]	426	1e-143	71.99	gi|359472981 PREDICTED: uncharacterized protein LOC100257723 isoform 2 from Vitis vinifera
10	scaffold00931	7353	8945	CUFF.32280.2	KAF7132854.1	hypothetical protein RHSIM_Rhsim09G0111400 [Rhododendron simsii]	234	3e-73	80.65	-
10	scaffold00931	9185	9399	GI3MI6V01A9XIS.path1.1	No hit					-
10	scaffold00931	17590	18186	CUFF.32263.1	KAF5940220.1	hypothetical protein HYC85_021387 [Camellia sinensis]	123	1e-29	83.58	gi|460382508 PREDICTED: BRO1 domain-containing protein BROX-like from Solanum lycopersicum
10	scaffold00931	18635	19322	CUFF.32264.1	No hit					-
10	scaffold00931	19399	19638	CUFF.32265.1	No hit					-
10	scaffold00931	19718	23764	CUFF.32268.1	KAF7132025.1	hypothetical protein RHSIM_Rhsim09G0111300 [Rhododendron simsii]	467	2e-161	91.67	-
10	scaffold00931	19718	23932	CUFF.32268.2	KAF7132025.1	hypothetical protein RHSIM_Rhsim09G0111300 [Rhododendron simsii]	467	1e-161	91.67	gi|225423907 PREDICTED: BRO1 domain-containing protein BROX from Vitis vinifera
10	scaffold00931	25339	25699	46909_g.1	No hit					-
10	scaffold00931	29094	31934	CUFF.32294.1	KAE9451057.1	hypothetical protein C3L33_17053 [Rhododendron williamsianum]	125	5e-27	89.06	gi|449519677 PREDICTED: mediator of RNA polymerase II transcription subunit 25-like, partial from Cucumis sativus
10	scaffold00931	35370	35940	46911_g.1	No hit					-
10	scaffold00931	36056	36383	CUFF.32296.1	AVP26536.1	hypothetical protein Ycf1 [Forsythia europaea]	47.8	0.002	62.86	-
10	scaffold00931	37610	48863	CUFF.32295.2	PSR91194.1	Mediator of RNA polymerase II transcription subunit like...	761	0	80.18	-
10	scaffold00931	37610	55457	CUFF.32295.1	KAF7132675.1	hypothetical protein RHSIM_Rhsim09G0111200 [Rhododendron simsii]	732	0	85.8	GN7I-14889-MONOMER (Bra024737) EC-2.3.3.9 malate synthase (scov=66.6,ident=61.6) PlantCyc GLYOXYLATE-BYPASS|glyoxylate cycle
10	scaffold00931	56871	57397	CUFF.32276.1	KAF7132675.1	hypothetical protein RHSIM_Rhsim09G0111200 [Rhododendron simsii]	90.5	7e-18	85.42	gi|460386536 PREDICTED: lysine histidine transporter-like 6-like from Solanum lycopersicum
10	scaffold00931	57977	61255	CUFF.32282.1	KAF7132675.1	hypothetical protein RHSIM_Rhsim09G0111200 [Rhododendron simsii]	680	0	97.7	gi|460386536 PREDICTED: lysine histidine transporter-like 6-like from Solanum lycopersicum
10	scaffold00931	65273	71580	CUFF.32319.1	KAF7133539.1	hypothetical protein RHSIM_Rhsim09G0111100 [Rhododendron simsii]	355	2e-120	94.69	gi|255576513 Transmembrane protein TPARL, putative from Ricinus communis
10	scaffold00931	77929	79854	CUFF.32269.1	KAE9451054.1	hypothetical protein C3L33_17056 [Rhododendron williamsianum]	712	0	93.53	gi|296086031 unnamed protein product from Vitis vinifera
10	scaffold00931	81510	96337	CUFF.32270.1	KAF7131670.1	hypothetical protein RHSIM_Rhsim09G0110900 [Rhododendron simsii]	649	0	85.64	-
10	scaffold00931	81510	96337	CUFF.32270.2	KAF7131670.1	hypothetical protein RHSIM_Rhsim09G0110900 [Rhododendron simsii]	894	0	83.43	GN7Y-22942-MONOMER (Potri.010G221500.4) EC-2.6.1.85 aminodeoxychorismate synthase (scov=68.3,ident=59.4) PlantCyc PWY-6543|4-aminobenzoate biosynthesis
10	scaffold00931	93407	93647	CUFF.32271.1	No hit					-
10	scaffold00931	97839	98106	CUFF.32272.1	No hit					-
10	scaffold01922	1060	1467	CUFF.44351.1	KAF7132075.1	hypothetical protein RHSIM_Rhsim09G0116900 [Rhododendron simsii]	199	4e-57	71.94	gi|297738233 unnamed protein product from Vitis vinifera
10	scaffold01922	3956	5715	CUFF.44365.1	KAE9451073.1	hypothetical protein C3L33_17015 [Rhododendron williamsianum]	788	0	91.63	gi|508709606 F-box/RNI-like superfamily protein isoform 1 from Theobroma cacao
10	scaffold01922	7768	10543	CUFF.44366.1	KAE9451073.1	hypothetical protein C3L33_17015 [Rhododendron williamsianum]	751	0	86.94	gi|462419491 hypothetical protein PRUPE_ppa006232mg from Prunus persica
10	scaffold01922	22142	22313	CUFF.44354.1	No hit					-
10	scaffold01922	31774	41029	CUFF.44355.1	XP_028071011.1	L10-interacting MYB domain-containing protein-like [Camellia...	129	3e-29	31.52	-
10	scaffold01922	31774	41029	CUFF.44355.2	KAF7124752.1	hypothetical protein RHSIM_Rhsim12G0127200 [Rhododendron simsii]	157	3e-35	80.22	gi|449516449 PREDICTED: phospholipid-transporting ATPase 3-like, partial from Cucumis sativus
10	scaffold01922	36922	37040	CUFF.44356.1	PSR96383.1	E3 ubiquitin-protein like [Actinidia chinensis var. chinensis]	82.8	6e-17	100	gi|356545285 PREDICTED: E3 ubiquitin ligase BIG BROTHER-like from Glycine max
10	scaffold01922	43747	47165	CUFF.44374.1	KAF7131567.1	hypothetical protein RHSIM_Rhsim09G0116700 [Rhododendron simsii]	271	1e-102	87.18	-
10	scaffold01922	43747	47165	CUFF.44374.2	KAF7131567.1	hypothetical protein RHSIM_Rhsim09G0116700 [Rhododendron simsii]	280	4e-90	93.42	-
10	scaffold01922	43747	47165	CUFF.44374.3	KAF7131567.1	hypothetical protein RHSIM_Rhsim09G0116700 [Rhododendron simsii]	401	1e-137	88.65	gi|225423785 PREDICTED: uncharacterized protein LOC100256033 isoform 1 from Vitis vinifera
10	scaffold01922	53056	53311	CUFF.44357.1	KAE9444700.1	hypothetical protein C3L33_23402 [Rhododendron williamsianum]	73.9	2e-13	49.4	gi|462412408 hypothetical protein PRUPE_ppa017244mg, partial from Prunus persica
10	scaffold01922	54161	54471	CUFF.44358.1	KAF7149735.1	hypothetical protein RHSIM_Rhsim02G0103800 [Rhododendron simsii]	103	7e-25	57.28	gi|255560695 ankyrin repeat-containing protein, putative from Ricinus communis
10	scaffold01922	57848	58710	66228_g.1	KAE9453388.1	hypothetical protein C3L33_14707 [Rhododendron williamsianum]	190	3e-56	78.26	gi|255560679 protein binding protein, putative from Ricinus communis
10	scaffold01951	10712	12262	CUFF.44792.1	KAF7133091.1	hypothetical protein RHSIM_Rhsim09G0108900 [Rhododendron simsii]	195	2e-55	84.27	gi|508710182 Uncharacterized protein TCM_011817 from Theobroma cacao
10	scaffold01951	19038	19370	66656_g.1	No hit					-
10	scaffold01951	22442	23647	gene.g23829.t1.1	XP_028112625.1	uncharacterized protein LOC114310743 [Camellia sinensis]	346	3e-115	54.57	gi|400131566 T4.5 from Malus x
10	scaffold01951	24894	25998	gene.g23830.t1.1	PKU87026.1	Retrovirus-related Pol polyprotein from transposon TNT 1-94...	60.1	1e-06	30.7	-
10	scaffold01951	42903	43502	CUFF.44648.1	KAF7132482.1	hypothetical protein RHSIM_Rhsim09G0108600 [Rhododendron simsii]	134	5e-35	69.49	gi|508710181 Uncharacterized protein TCM_011816 from Theobroma cacao
10	scaffold01951	48687	49252	CUFF.44649.1	No hit					-
10	scaffold02500	47	4166	CUFF.48151.1	RVW17006.1	Amino-acid permease BAT1-like [Vitis vinifera]	170	4e-50	74.47	gi|297737762 unnamed protein product from Vitis vinifera
10	scaffold02500	4507	4805	CUFF.48152.1	No hit					-
10	scaffold02500	4961	5336	CUFF.48153.1	No hit					-
10	scaffold02500	5841	6508	CUFF.48154.1	No hit					-
10	scaffold02500	6881	11302	CUFF.48157.1	KAF8399066.1	hypothetical protein HHK36_014932 [Tetracentron sinense]	757	0	83.09	gi|502120621 PREDICTED: amino-acid permease BAT1 homolog from Cicer arietinum
10	scaffold02500	9965	11302	CUFF.48157.2	KAE9450966.1	hypothetical protein C3L33_17122 [Rhododendron williamsianum]	330	4e-110	97.65	-
10	scaffold02500	11601	11768	GI3MI6V01BHBAI.path1.1	No hit					-
10	scaffold02500	19131	21989	72557_g.1	PSR91121.1	Amino-acid permease [Actinidia chinensis var. chinensis]	404	2e-135	83.64	gi|297737761 unnamed protein product from Vitis vinifera
10	scaffold02500	23563	23810	CUFF.48158.1	No hit					-
10	scaffold02500	24468	25011	72558_g.1	KAE9450966.1	hypothetical protein C3L33_17122 [Rhododendron williamsianum]	231	2e-71	87.77	gi|502120630 PREDICTED: amino-acid permease BAT1 homolog isoform X2 from Cicer arietinum
10	scaffold02500	27662	28400	CUFF.48144.1	No hit					-
10	scaffold02652	20315	25068	CUFF.48731.1	BAM42672.1	leucoanthocyanidin reductase [Vaccinium ashei]	639	0	98.48	GN7Y-36438-MONOMER (Potri.010G129800.3) EC-1.17.1.3 leucoanthocyanidin reductase (scov=87.6,ident=75.8) PlantCyc PWY-6029|2,3-trans-flavanols biosynthesis;PWY-6035|2,3-cis-flavanols biosynthesis
